# Supplementary material
Source: Springer Nature journal article supplement (https://www.springermedizin.de/resource/supplementary/12889_2010_3215_MOESM4_ESM.pdf/9488324)
Supplement: MOESM4 [file 9488324]

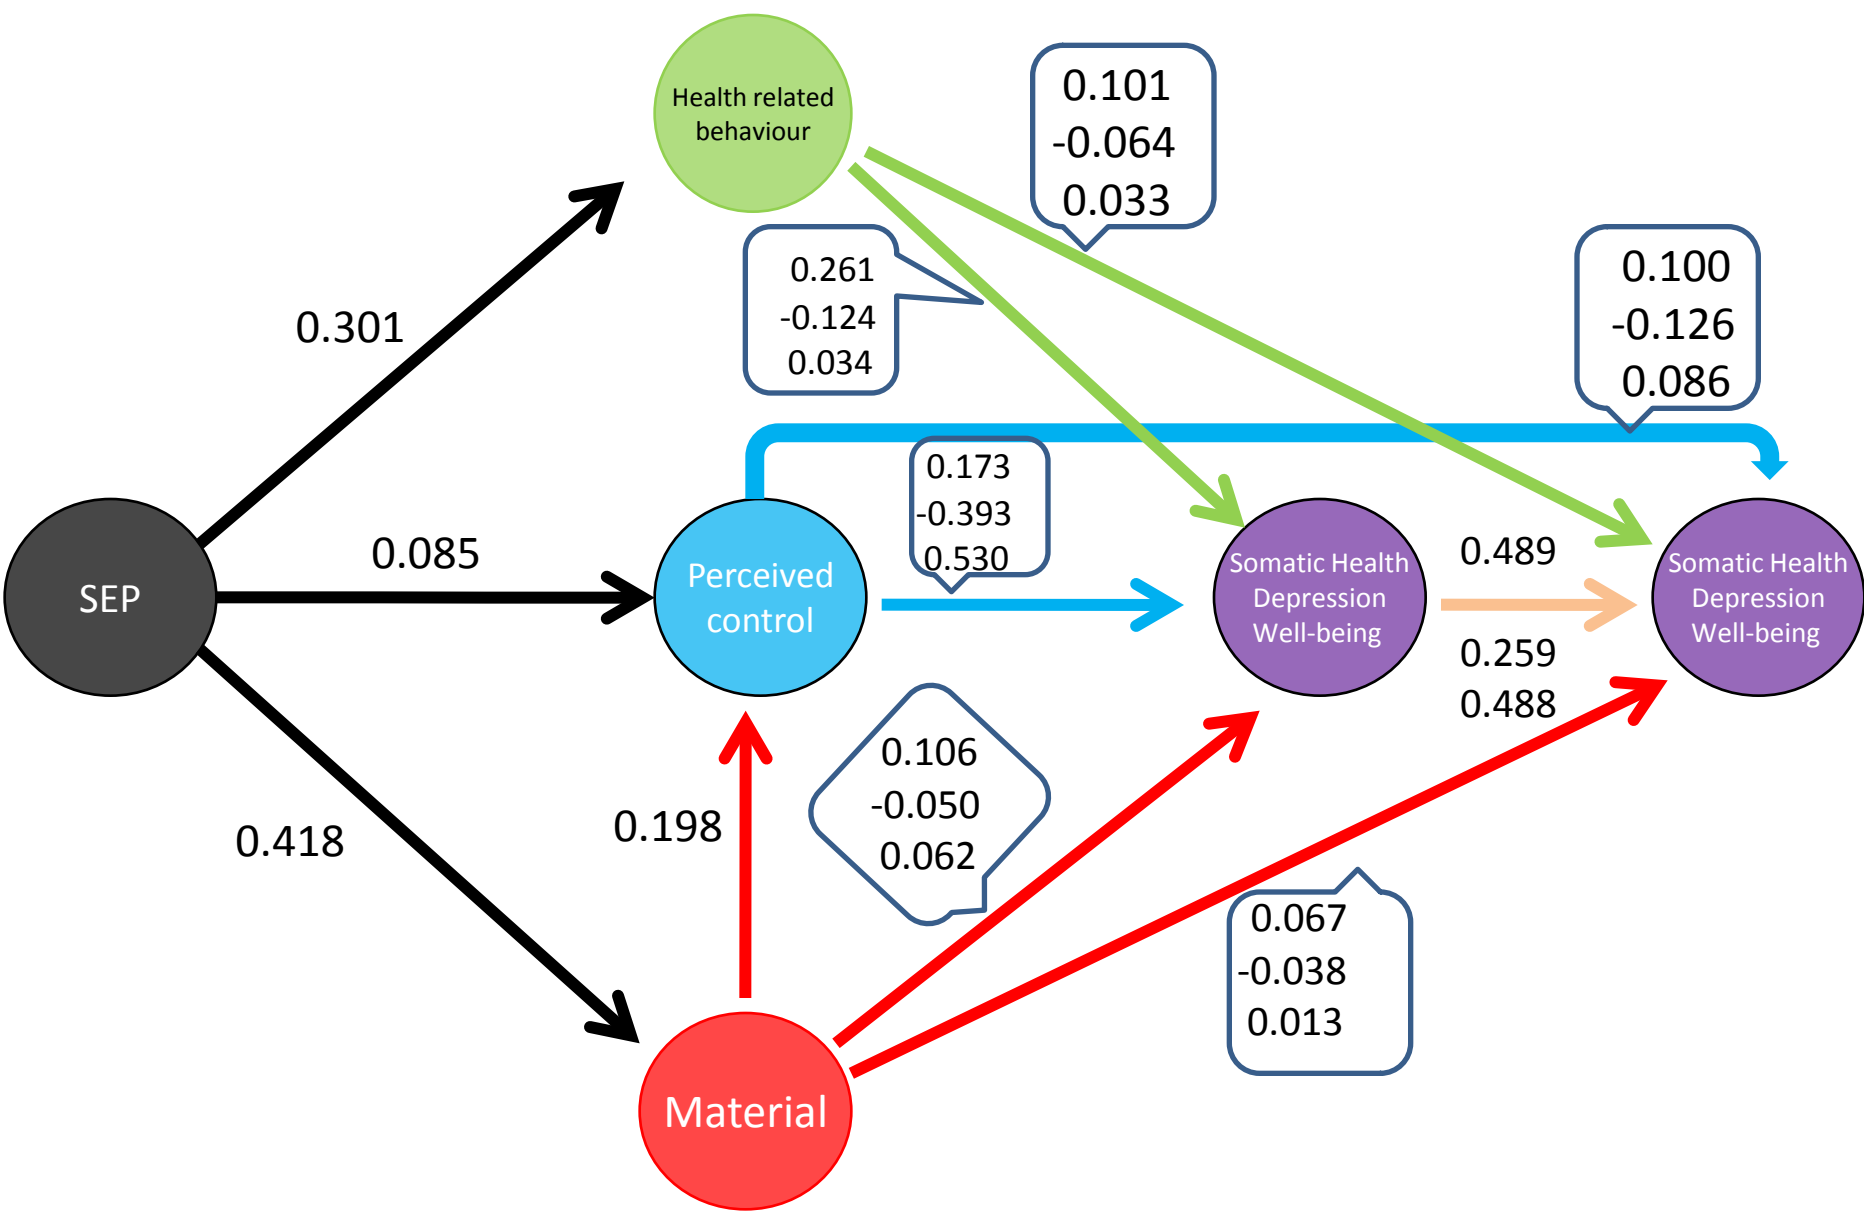

SEP

Health related  
behaviour

Perceived  
control

Material

Somatic Health  
Depression  
Well-being

Somatic Health  
Depression  
Well-being

0.301

0.085

0.418

0.198

0.261  
-0.124  
0.034

0.173  
-0.393  
0.530

0.106  
-0.050  
0.062

0.067  
-0.038  
0.013

0.101  
-0.064  
0.033

0.100  
-0.126  
0.086

0.489

0.259  
0.488
